# Supplementary material for: Modeling cross-regulatory influences on monolignol transcripts and proteins under single and combinatorial gene knockdowns in Populus trichocarpa
Source: PubMed Central journal article supplement (PMC7147730; doi:10.1371/journal.pcbi.1007197), 2020-04-10

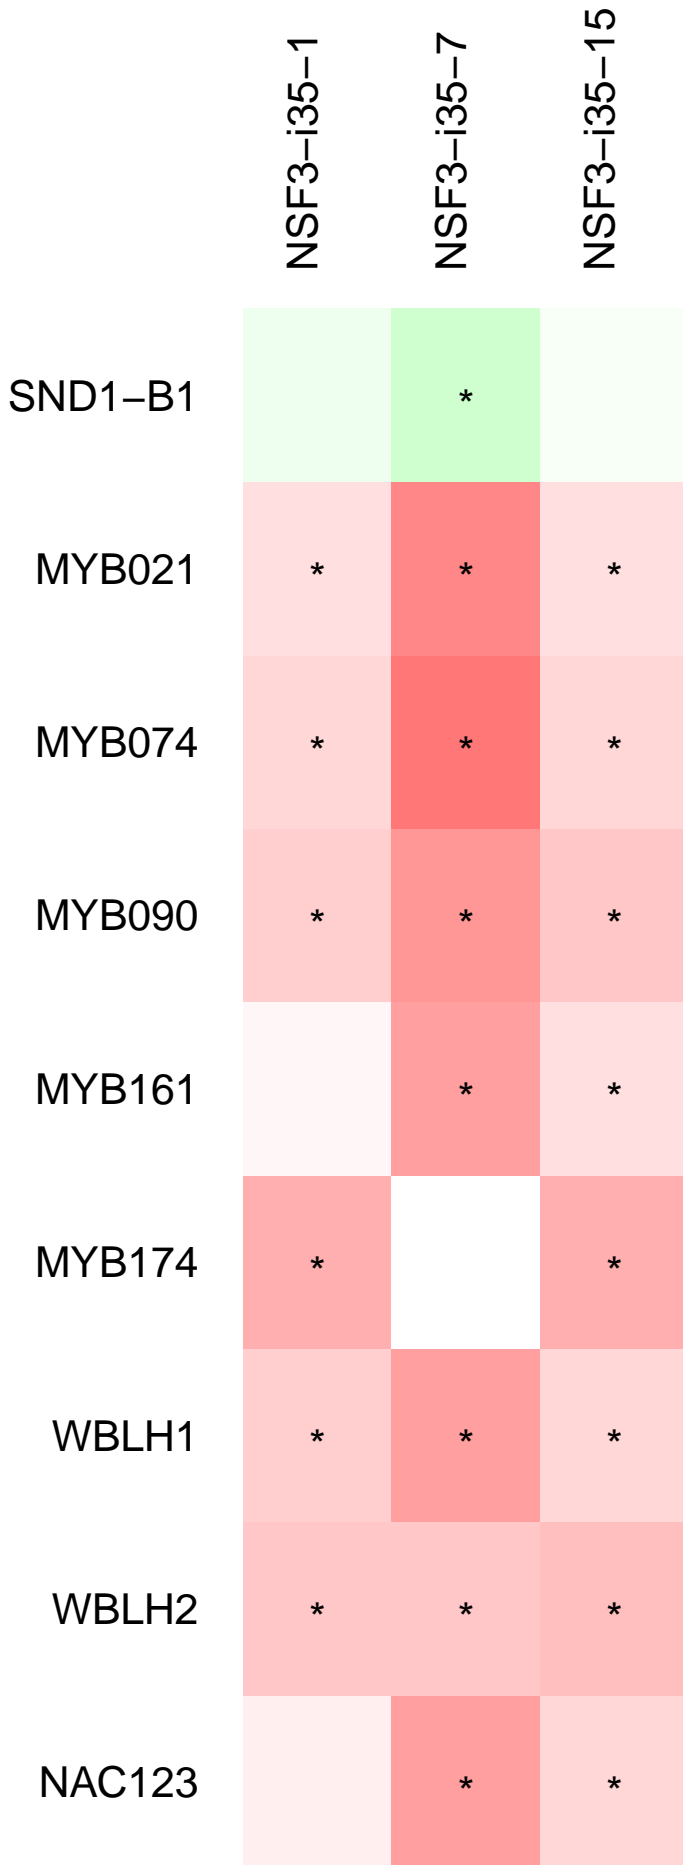

### Color Key

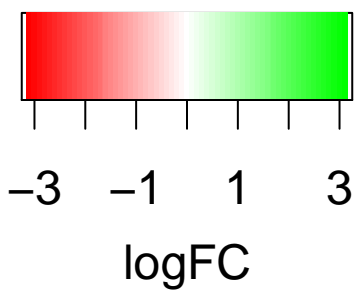

Supplement: pcbi.1007197.s006.pdf [file pcbi.1007197.s006.pdf]
